# Supplementary material for: Vibrational spectroscopy in sensing radiobiological effects: analyses of targeted and non-targeted effects in human keratinocytes
Source: Royal Society of Chemistry journal article supplement (doi:10.1039/c5fd00208g), 2015-12-14
Supplement: c5fd00208g1.pdf [file c5fd00208g1.pdf]

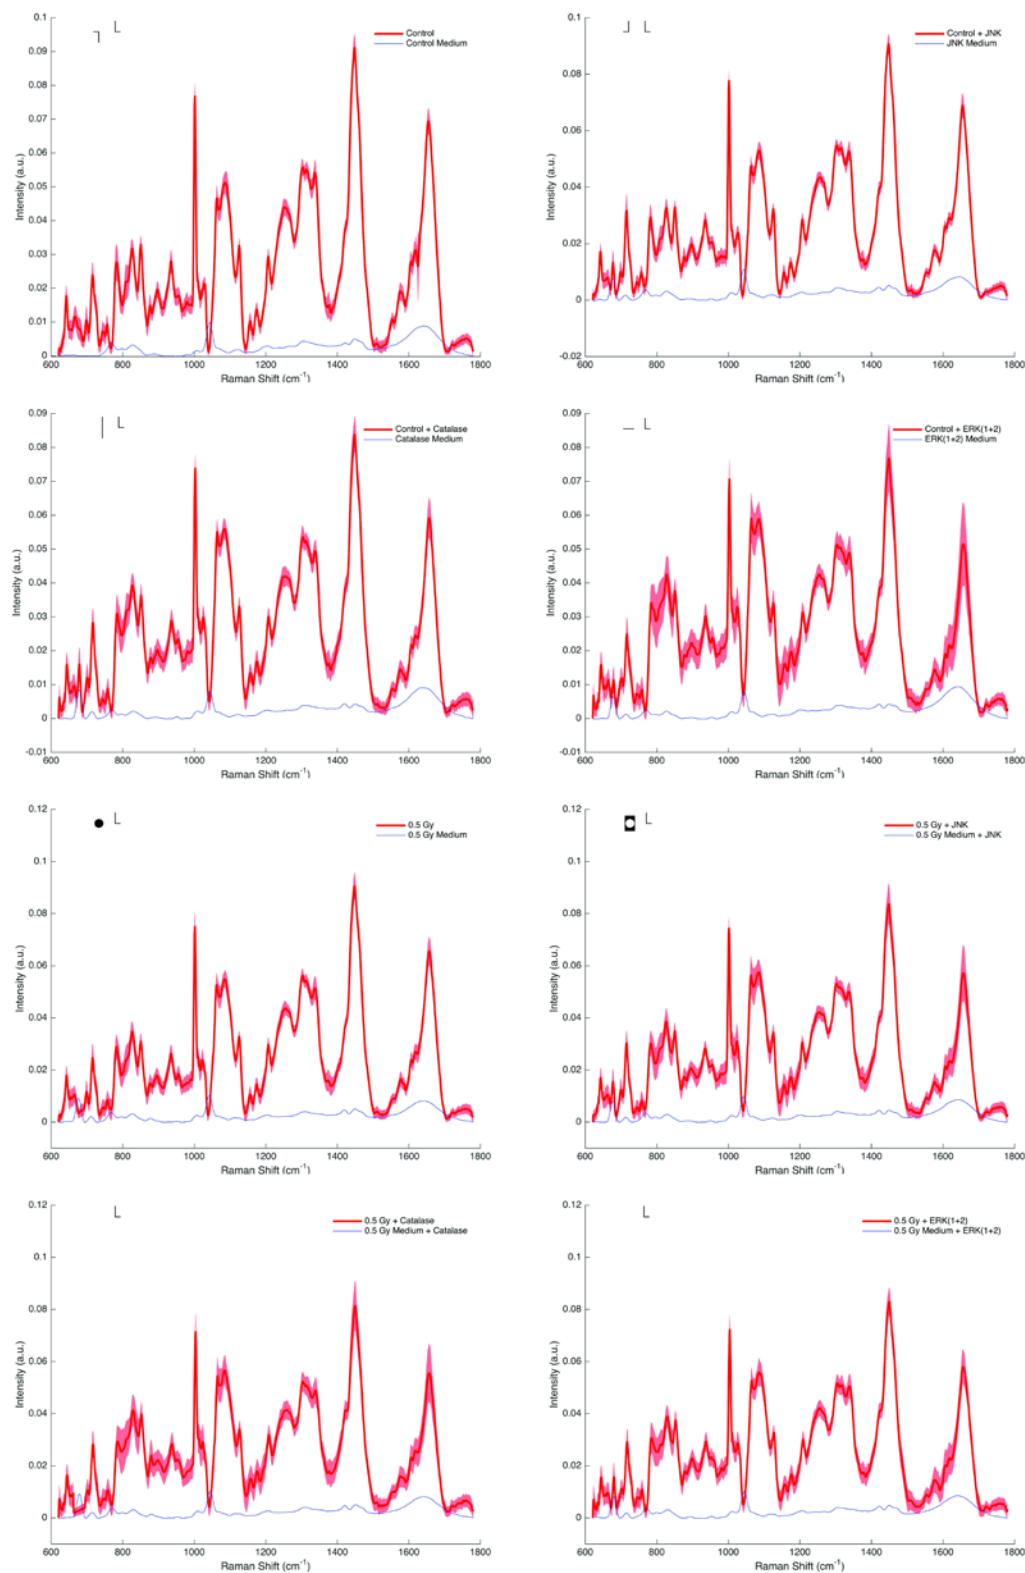

Figure S1. Mean spectra of each ICCM exposed sample at 24 hours together with spectra of the medium. (a) Control, (b) Control + JNK inhibitor, (c) Control + Catalase, (d) Control + ERK12 inhibitor, (e) 0.5Gy ICCM, (f) 0.5Gy ICCM + JNK inhibitor, (g) 0.5Gy ICCM + Catalase, (h) 0.5Gy ICCM + ERK12 inhibitor.
